# Supplementary material
Source: PubMed Central journal article supplement (PMC7211449)
Supplement: rspb20192964supp2.pdf [file rspb20192964supp2.pdf]

## Supplementary figures and tables

Influence of past climatic change on phylogeography and demographic history of narwhals,  
*Monodon monoceros*

Marie Louis, Mikkel Skovrind, Jose Alfredo Samaniego Castruita, Cristina Garilao, Kristin Kaschner, Shyam Gopalakrishnan, James S. Haile, Christian Lydersen, Kit M. Kovacs, Eva Garde, Mads Peter Heide-Jørgensen, Lianne Postma, Steven H. Ferguson, Eske Willerslev, Eline D. Lorenzen

DOI: 1098/rspb.2019-2964

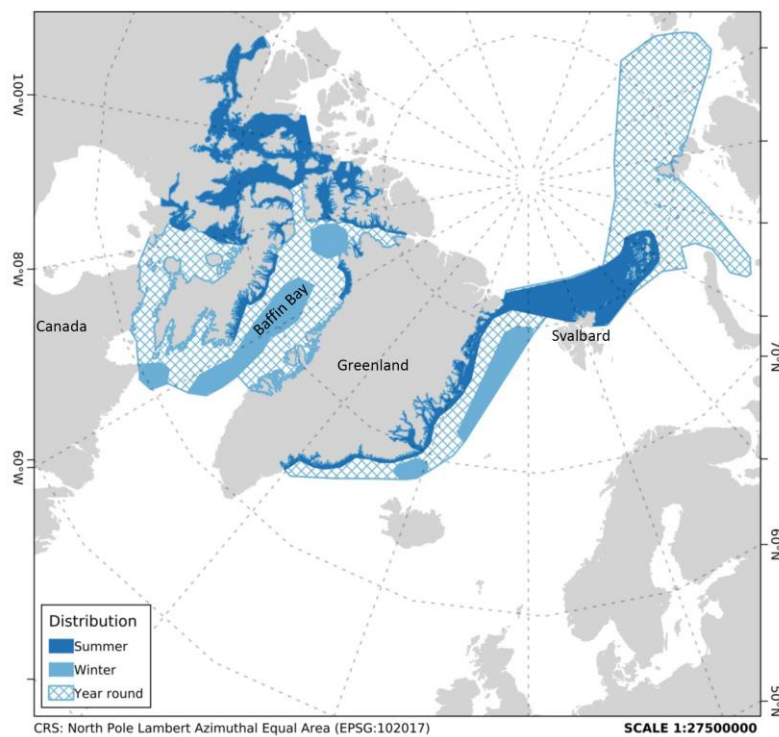

Figure S1. Distribution maps of narwhals for summer, winter and year-round. Adapted from maps recently compiled by a panel of narwhal experts at the NAMMCO meeting in 2018 [1]. Note that a recent study indicated that narwhals between North-East Greenland and Svalbard are present year-round [2].

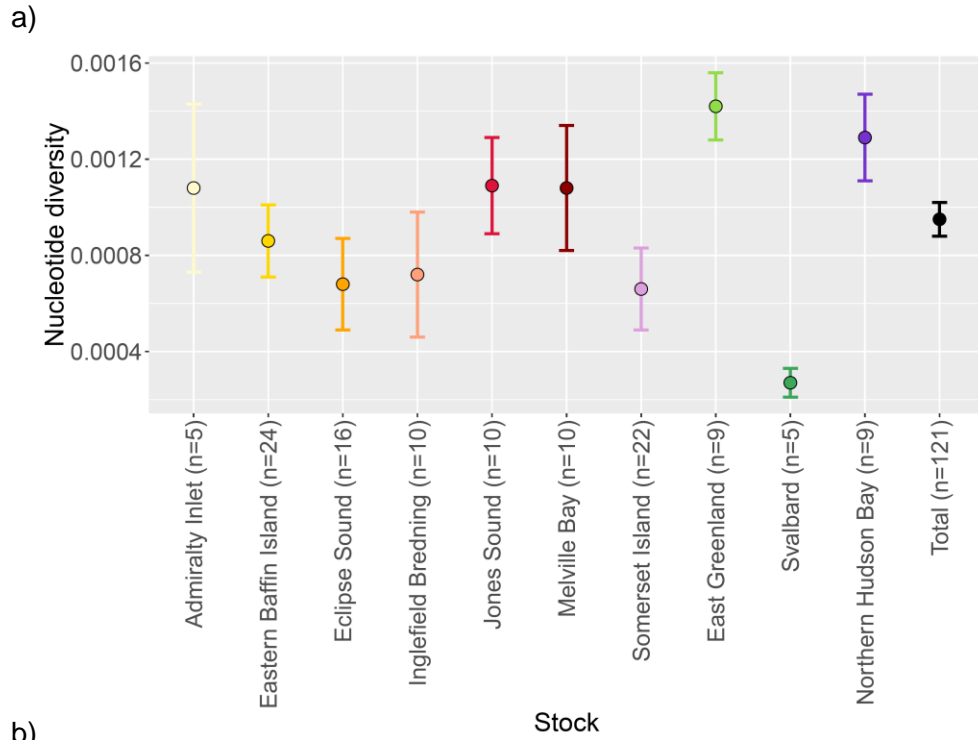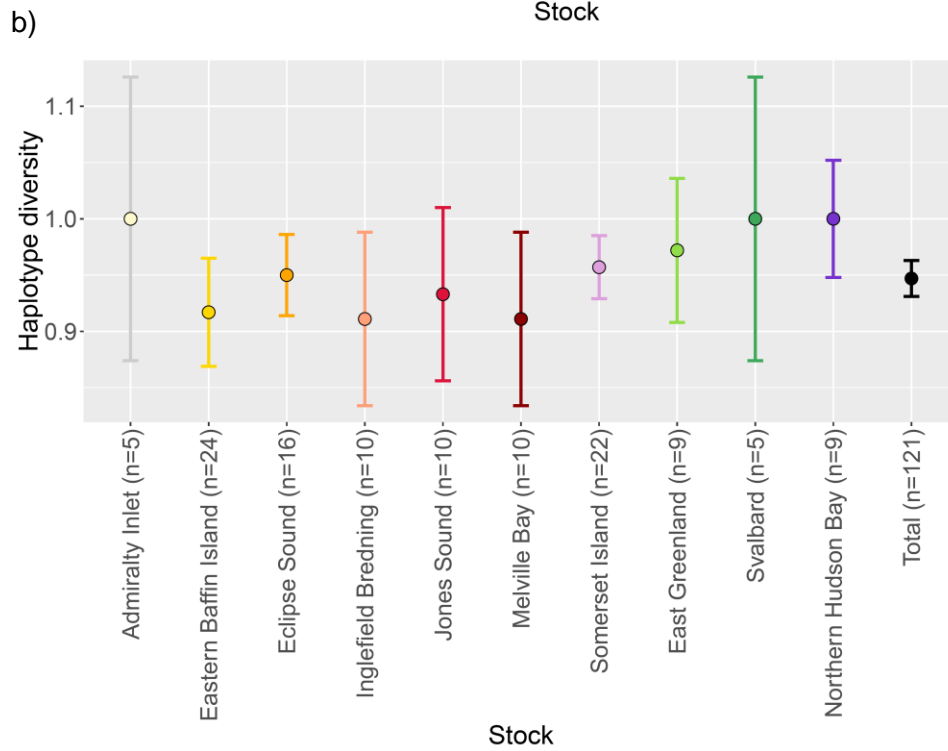

Figure S2. a) Nucleotide diversity and b) haplotype diversity for each narwhal summer stock (Smith Sound is excluded due to n=1) and for the whole dataset (n=121).

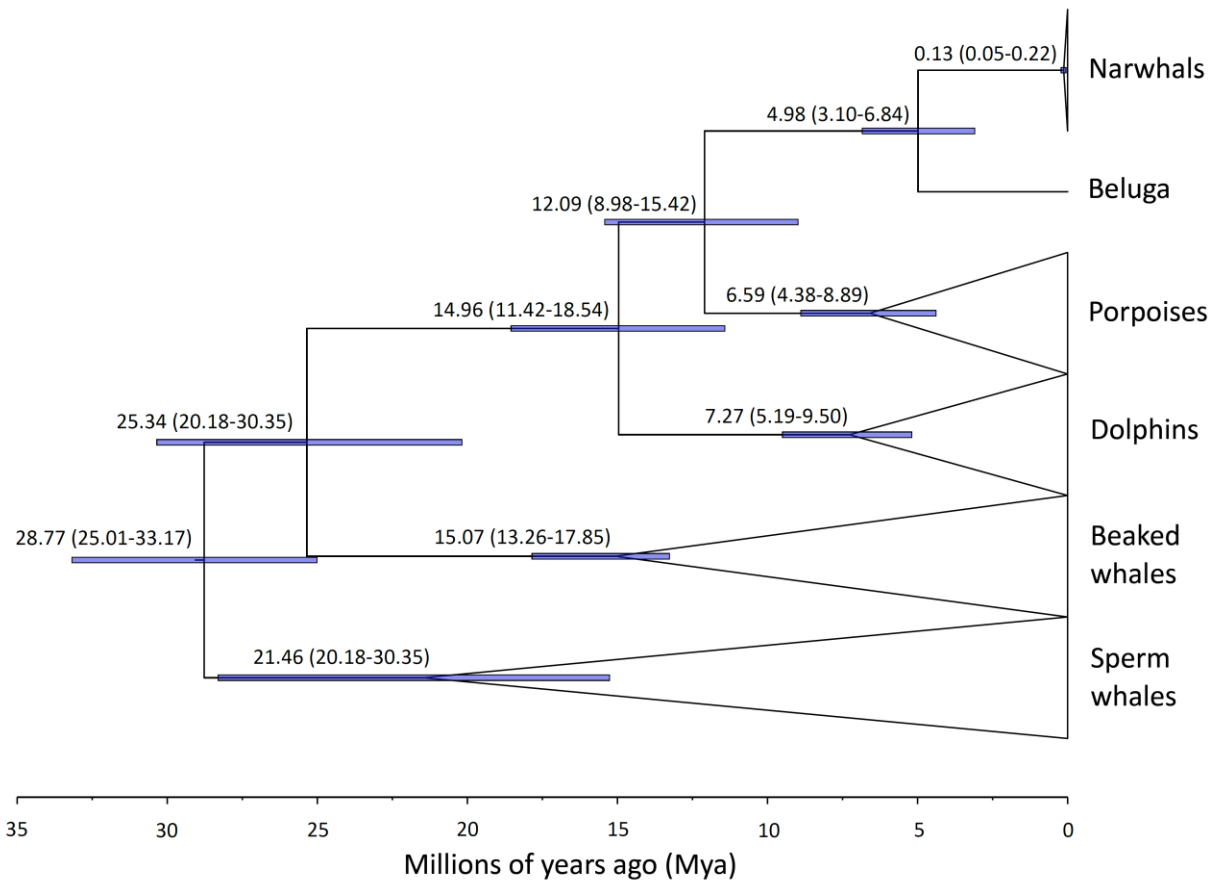

Figure S3. Fossil-calibrated phylogeny of 15 toothed whales inferred using a calibrated Yule prior model using the tRNAs, rRNAs, first and second codon positions of the protein coding regions. Only nodes with a posterior probability >0.9 are shown, and nodes for species within each family, apart from the Monodontidae, were collapsed. Numbers represent mean TMRCA and 95% HPD. The 95% HPD of divergence time estimates are also represented by horizontal blue bars. The four narwhal sequences included were from the most divergent clades in the haplotype network.

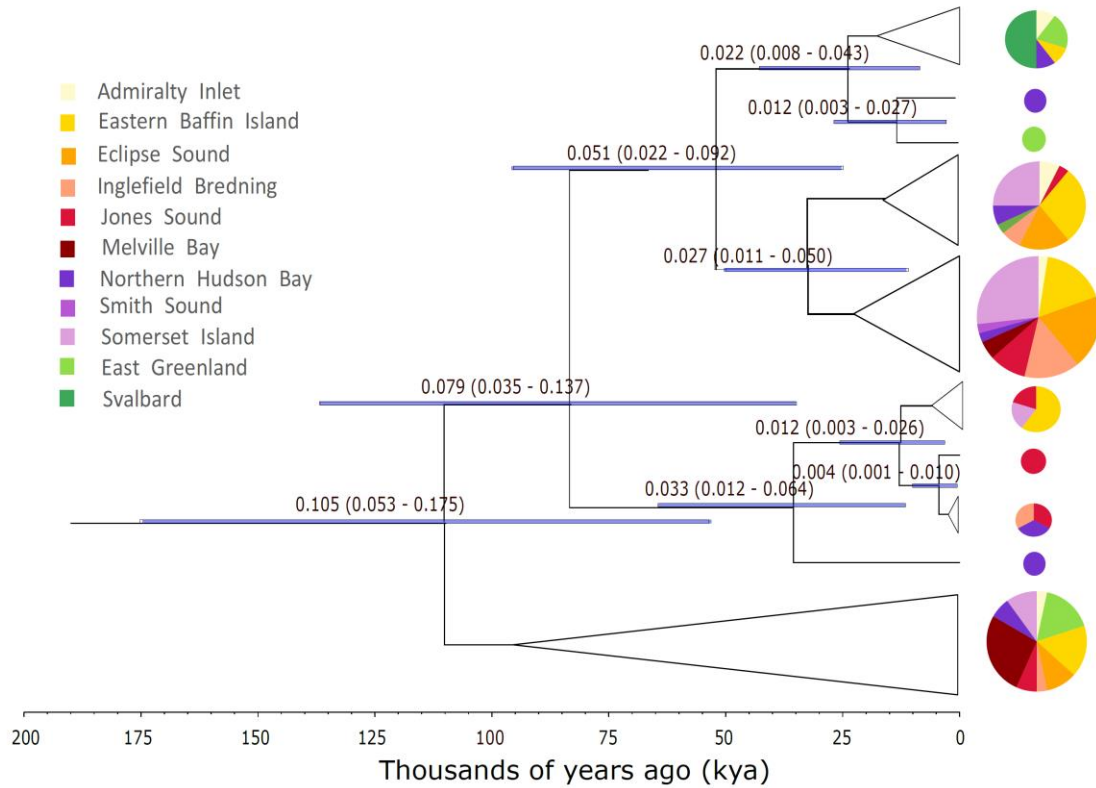

Figure S4. Time-calibrated phylogeny of 64 haplotypes found among the 121 narwhal mitogenome sequences inferred with a coalescent constant population size model using the tRNAs, rRNAs, first, second and third codon positions of the protein coding regions and the control region. Nodes which lack support (posterior values < 0.9) are collapsed. Numbers represent the mean TMRCA and 95% HPD. The 95% HPD of divergence time estimates are also represented by horizontal blue bars. Pie chart colours and size indicate which stocks are represented in each clade, and relative number of individuals, respectively.

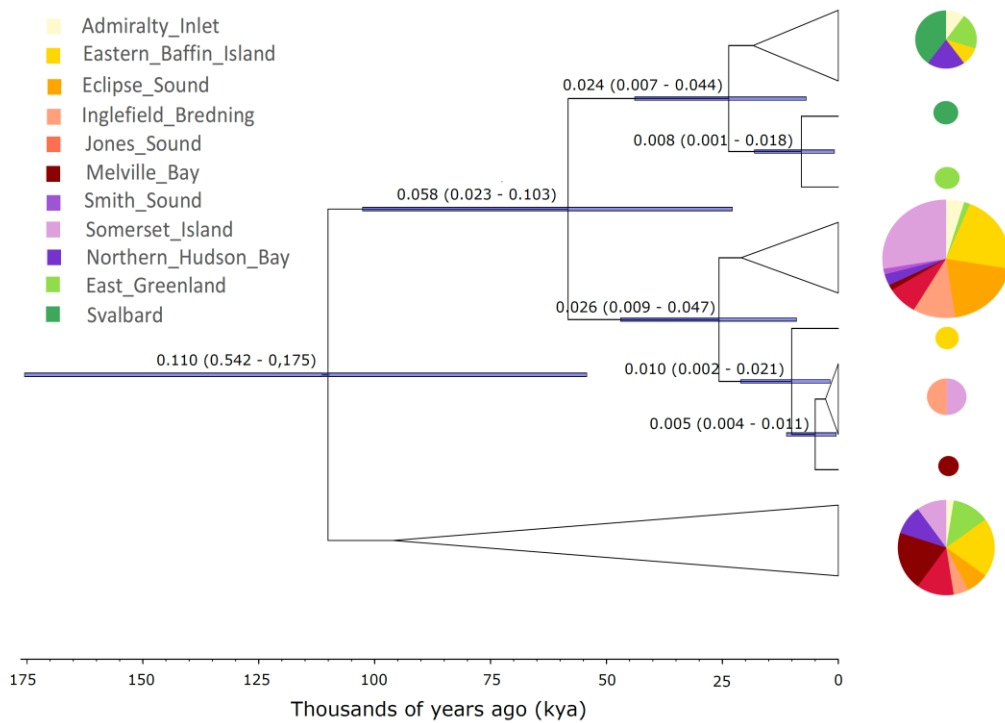

Figure S5. Time-calibrated phylogeny of 43 haplotypes found among the 121 narwhal third codon positions only of the mitogenome sequences inferred with a coalescent constant population size model. Nodes which lack support (posterior values < 0.9) are collapsed. Numbers represent the mean TMRCA and 95% HPD in TMRCA. The 95% HPD of divergence time estimates are also represented by horizontal blue bars. Pie chart colours and size indicate which stocks are represented in each clade, and relative number of individuals, respectively.

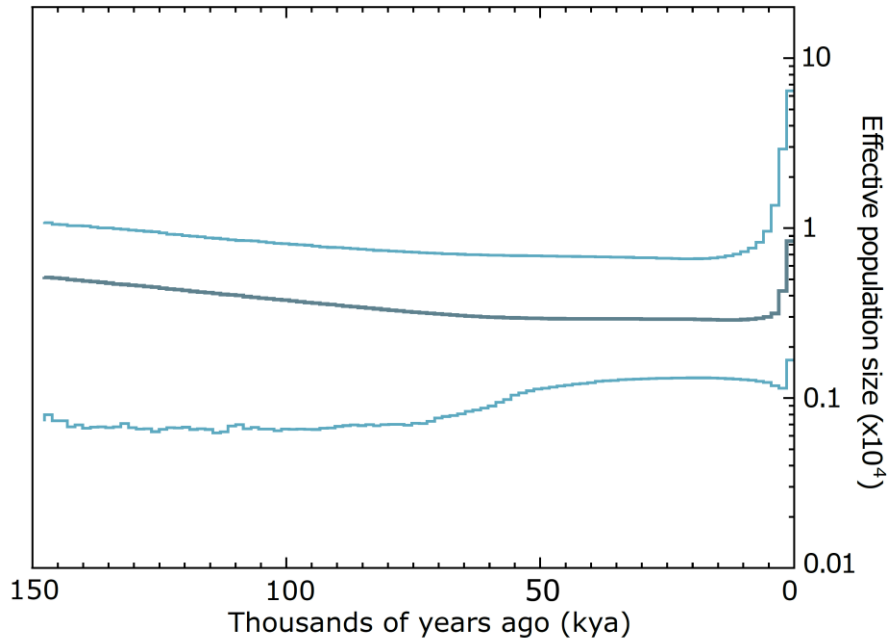

Figure S6. Bayesian skyline plot of narwhal median (turquoise line) female effective population size ( $N_{ef}$ ) and 95% CI (lighter turquoise lines) through time with only the third codon positions of the mitogenomes.

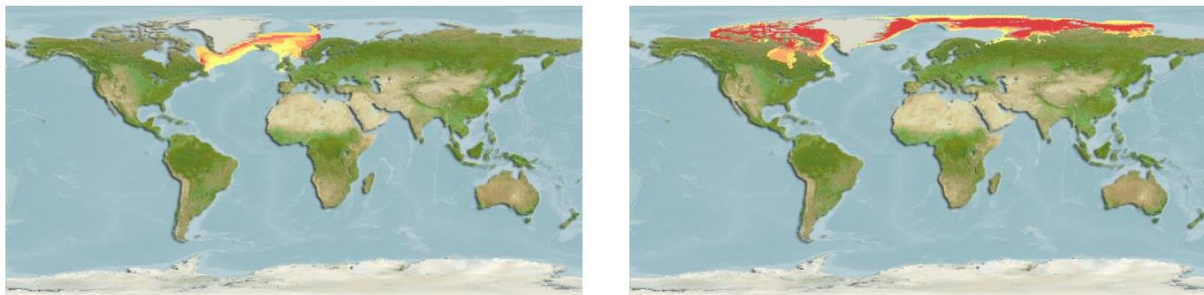

Figure S7. Extent of sea ice and suitable habitat for the narwhal in the summer estimated using Aquamaps during the Last Glacial Maximum (LGM, 20 kya, left) and at present (right). Sea surface temperature, depth and sea ice concentration are included as parameters. The colour scale indicates habitat suitability (0-1) with a score of 1 in red.

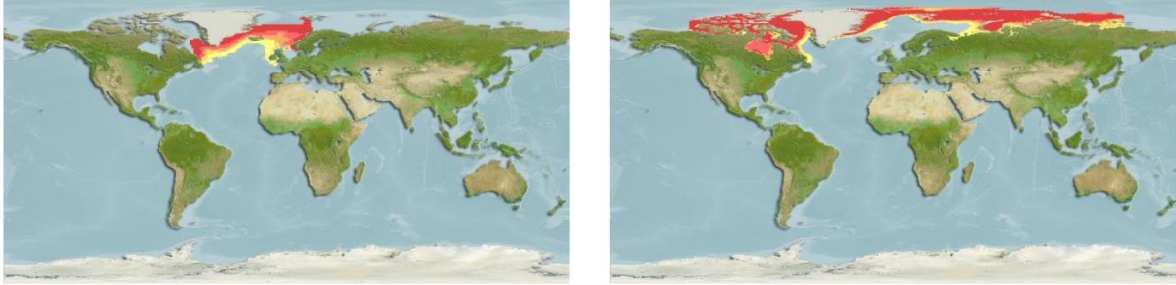

Figure S8. Extent of sea ice and suitable habitat for narwhals year-round estimated using Aquamaps during the Last Glacial Maximum (LGM, 20 kya, left) and at present (right). Sea surface temperature, depth and sea ice concentration are included as parameters. The colour scale indicates habitat suitability (0-1) with a score of 1 in red.

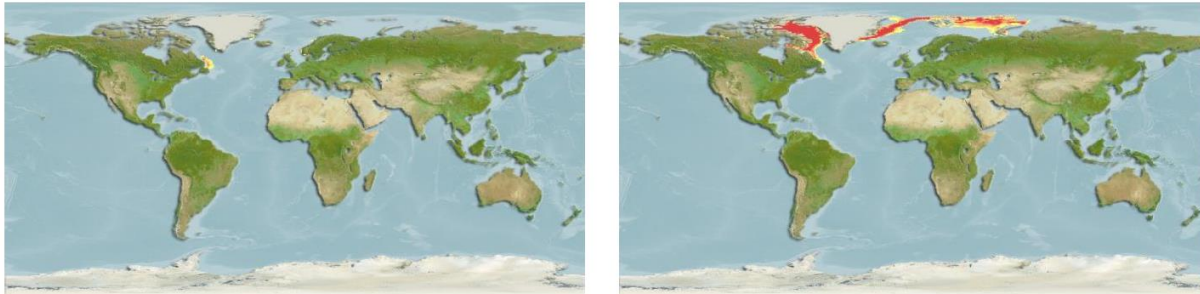

Figure S9. Extent of sea ice and suitable habitat for the narwhal in the winter estimated using Aquamaps during the Last Glacial Maximum (LGM, 20 kya, left) and at present (right). Sea surface temperature, depth, sea ice concentration and salinity are included as parameters. The colour scale indicates habitat suitability (0-1) with a score of 1 in red.

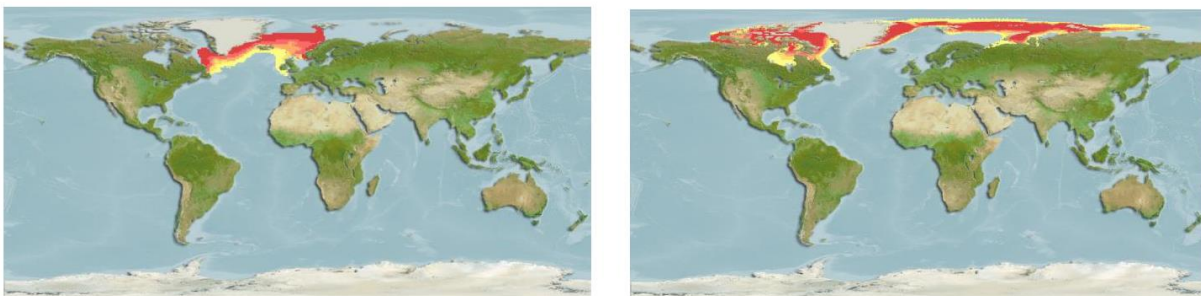

Figure S10. Extent of sea ice and suitable habitat for the narwhal in the summer estimated using Aquamaps during the Last Glacial Maximum (LGM, 20 kya, left) and at present (right).

Sea surface temperature, depth, sea ice concentration and salinity are included as parameters. The colour scale indicates habitat suitability (0-1) with a score of 1 in red.

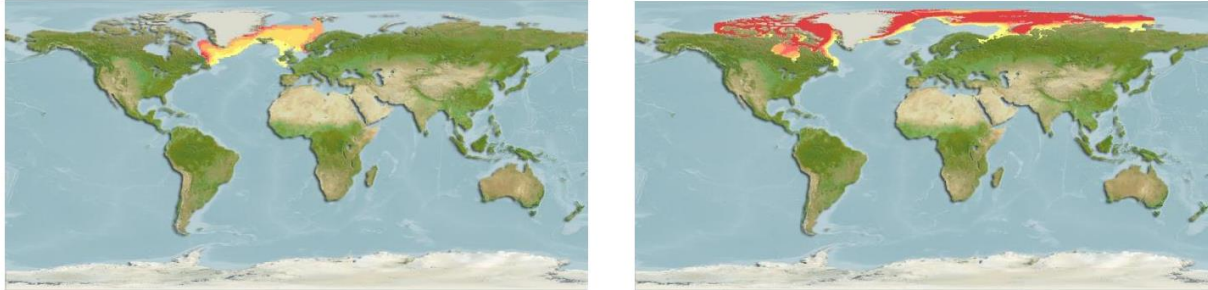

Figure S11. Extent of sea ice and suitable habitat for the narwhal in the summer estimated using Aquamaps during the Last Glacial Maximum (LGM, 20 kya, left) and at present (right). Sea surface temperature, depth, sea ice concentration and salinity are included as parameters. The colour scale indicates habitat suitability (0-1) with a score of 1 in red.

Table S1. Narwhal samples included in this study. Sample\_CGG\_ID in the sample ID refer to the Centre for GeoGenetics database sample ID at the University of Copenhagen while sample\_ID refers to the sample ID provided by the source institution.

| sample_CGG_ID | sample_ID   | stock          | locality       | date           | haplotypes | Genbank Acc |
|---------------|-------------|----------------|----------------|----------------|------------|-------------|
| CGG_1_012748  | M.sv.4/SV08 | Svalbard       | Svalbard       | August-2014    | Mmon_52    | MT251277    |
| CGG_1_017165  | MM98-1      | Svalbard       | svalbard       | August-1998    | Mmon_1     | MT251226    |
| CGG_1_017166  | MM98-2      | Svalbard       | svalbard       | August-1998    | Mmon_2     | MT251227    |
| CGG_1_017167  | MM98-3      | Svalbard       | svalbard       | August-1998    | Mmon_3     | MT251228    |
| CGG_1_017173  | 829         | Eclipse Sound  | Tremblay Sound | 15-August-1999 | Mmon_17    | MT251242    |
| CGG_1_017186  | 964         | East Greenland | Hjørnedal      | 01-August-2012 | Mmon_53    | MT251278    |
| CGG_1_017187  | 965         | East Greenland | Hjørnedal      | 01-August-2012 | Mmon_54    | MT251279    |
| CGG_1_017188  | 968         | East Greenland | Hjørnedal      | 01-August-2012 | Mmon_55    | MT251280    |



|              |           |                       |                  |                |         |          |
|--------------|-----------|-----------------------|------------------|----------------|---------|----------|
| CGG_1_017190 | 987       | East Greenland        | Hjørnedal        | 19-August-2012 | Mmon_6  | MT251231 |
| CGG_1_017191 | 988       | East Greenland        | Hjørnedal        | 19-August-2012 | Mmon_8  | MT251233 |
| CGG_1_017192 | 989       | East Greenland        | Hjørnedal        | 19-August-2012 | Mmon_16 | MT251241 |
| CGG_1_017193 | 990       | East Greenland        | Hjørnedal        | 19-August-2012 | Mmon_4  | MT251229 |
| CGG_1_017194 | 992       | East Greenland        | Hjørnedal        | 17-August-2012 | Mmon_5  | MT251230 |
| CGG_1_017195 | 994       | East Greenland        | Hjørnedal        | 17-August-2012 | Mmon_6  | MT251231 |
| CGG_1_017198 | 1000      | Smith Sound           | Smith Sound      | 14-August-2013 | Mmon_56 | MT251281 |
| CGG_1_017208 | AB87-105  | Admiralty Inlet       | Arctic Bay       | 16-July-1987   | Mmon_44 | MT251269 |
| CGG_1_017209 | AB87-108  | Admiralty Inlet       | Arctic Bay       | 17-July-1987   | Mmon_5  | MT251230 |
| CGG_1_017212 | AB04-007  | Admiralty Inlet       | Arctic Bay       | 2004           | Mmon_4  | MT251229 |
| CGG_1_017213 | AB09-001  | Admiralty Inlet       | Arctic Bay       | 15-August-2009 | Mmon_4  | MT251229 |
| CGG_1_017214 | AB09-006  | Admiralty Inlet       | Arctic Bay       | 18-August-2009 | Mmon_57 | MT251282 |
| CGG_1_017217 | BI95-288  | Eastern Baffin Island | Broughton Island | 02-August-1995 | Mmon_4  | MT251229 |
| CGG_1_017220 | BI95-328  | Eastern Baffin Island | Broughton Island | 30-July-1995   | Mmon_4  | MT251229 |
| CGG_1_017221 | BI04-1085 | Eastern Baffin Island | Broughton Island | 10-August-2004 | Mmon_4  | MT251229 |
| CGG_1_017222 | BI04-1086 | Eastern Baffin Island | Broughton Island | 10-July-2004   | Mmon_7  | MT251232 |
| CGG_1_017223 | BI07-1119 | Eastern Baffin Island | Broughton Island | 2007           | Mmon_8  | MT251233 |
| CGG_1_017224 | BI07-1126 | Eastern Baffin Island | Broughton Island | 2007           | Mmon_4  | MT251229 |
| CGG_1_017225 | BI08-1118 | Eastern Baffin Island | Broughton Island | 2007           | Mmon_9  | MT251234 |
| CGG_1_017226 | CR94-203  | Eastern Baffin Island | Clyde River      | 31-July-1994   | Mmon_10 | MT251235 |

|              |            |                          |              |                |         |          |
|--------------|------------|--------------------------|--------------|----------------|---------|----------|
| CGG_1_017227 | CR94-206   | Eastern Baffin<br>Island | Clyde River  | 01-July-1994   | Mmon_11 | MT251236 |
| CGG_1_017228 | CR95-361   | Eastern Baffin<br>Island | Clyde River  | 06-August-1995 | Mmon_12 | MT251237 |
| CGG_1_017229 | CR04-1010  | Eastern Baffin<br>Island | Clyde River  | 2004           | Mmon_13 | MT251238 |
| CGG_1_017230 | CR04-1012  | Eastern Baffin<br>Island | Clyde River  | 2004           | Mmon_4  | MT251229 |
| CGG_1_017231 | CR04-1014  | Eastern Baffin<br>Island | Clyde River  | 2004           | Mmon_4  | MT251229 |
| CGG_1_017232 | CR04-1017  | Eastern Baffin<br>Island | Clyde River  | 2004           | Mmon_14 | MT251239 |
| CGG_1_017233 | CR05-1032  | Eastern Baffin<br>Island | Clyde River  | 2005           | Mmon_15 | MT251240 |
| CGG_1_017234 | CR05-1048  | Eastern Baffin<br>Island | Clyde River  | 2005           | Mmon_16 | MT251241 |
| CGG_1_017235 | CB00-7929  | Somerset Island          | Creswell Bay | 24-August-2000 | Mmon_17 | MT251242 |
| CGG_1_017237 | CB01-20692 | Somerset Island          | Creswell Bay | 09-August-2001 | Mmon_4  | MT251229 |
| CGG_1_017238 | CB01-3960  | Somerset Island          | Creswell Bay | 09-August-2001 | Mmon_18 | MT251243 |
| CGG_1_017239 | CB01-7927  | Somerset Island          | Creswell Bay | 07-August-2001 | Mmon_19 | MT251244 |
| CGG_1_017240 | CB01-7928  | Somerset Island          | Creswell Bay | 08-August-2001 | Mmon_5  | MT251230 |
| CGG_1_017242 | GF99-1010  | Jones Sound              | Grise Fiord  | 16-August-1999 | Mmon_58 | MT251283 |
| CGG_1_017243 | GF99-1015  | Jones Sound              | Grise Fiord  | 16-August-1999 | Mmon_23 | MT251248 |
| CGG_1_017244 | GF99-1017  | Jones Sound              | Grise Fiord  | 16-August-1999 | Mmon_20 | MT251245 |
| CGG_1_017245 | GF99-1022  | Jones Sound              | Grise Fiord  | 16-August-1999 | Mmon_21 | MT251246 |
| CGG_1_017246 | GF03-1095  | Jones Sound              | Grise Fiord  | 09-August-2003 | Mmon_22 | MT251247 |
| CGG_1_017247 | GF03-1107  | Jones Sound              | Grise Fiord  | 10-August-2003 | Mmon_5  | MT251230 |
| CGG_1_017248 | GF07-1124  | Jones Sound              | Grise Fiord  | 27-July-2007   | Mmon_4  | MT251229 |
| CGG_1_017249 | GF07-1129  | Jones Sound              | Grise Fiord  | 31-July-2007   | Mmon_23 | MT251248 |

|              |                  |                          |             |                |         |          |
|--------------|------------------|--------------------------|-------------|----------------|---------|----------|
| CGG_1_017250 | <i>GF07-1131</i> | Jones Sound              | Grise Fiord | 28-July-2007   | Mmon_23 | MT251248 |
| CGG_1_017251 | <i>GF07-1137</i> | Jones Sound              | Grise Fiord | 27-July-2007   | Mmon_5  | MT251230 |
| CGG_1_017252 | <i>IG95-441</i>  | Somerset Island          | Igloolik    | 03-August-1995 | Mmon_24 | MT251249 |
| CGG_1_017253 | <i>IG95-462</i>  | Somerset Island          | Igloolik    | 04-August-1995 | Mmon_4  | MT251229 |
| CGG_1_017254 | <i>IG95-465</i>  | Somerset Island          | Igloolik    | 04-August-1995 | Mmon_24 | MT251249 |
| CGG_1_017255 | <i>IG95-480</i>  | Somerset Island          | Igloolik    | 05-August-1995 | Mmon_24 | MT251249 |
| CGG_1_017256 | <i>IG95-481</i>  | Somerset Island          | Igloolik    | 04-August-1995 | Mmon_7  | MT251232 |
| CGG_1_017257 | <i>IG06-1222</i> | Somerset Island          | Igloolik    | 2006           | Mmon_4  | MT251229 |
| CGG_1_017258 | <i>IG06-1231</i> | Somerset Island          | Igloolik    | 2006           | Mmon_4  | MT251229 |
| CGG_1_017259 | <i>IG06-1238</i> | Somerset Island          | Igloolik    | 2006           | Mmon_24 | MT251249 |
| CGG_1_017260 | <i>IG06-1242</i> | Somerset Island          | Igloolik    | 2006           | Mmon_25 | MT251250 |
| CGG_1_017261 | <i>PG96-524</i>  | Eastern Baffin<br>Island | Pangnirtung | 27-July-1996   | Mmon_34 | MT251259 |
| CGG_1_017262 | <i>PG95-548</i>  | Eastern Baffin<br>Island | Pangnirtung | 27-July-1996   | Mmon_4  | MT251229 |
| CGG_1_017263 | <i>PG93-170</i>  | Eastern Baffin<br>Island | Pangnirtung | 27-July-1996   | Mmon_26 | MT251251 |
| CGG_1_017264 | <i>PG96-151</i>  | Eastern Baffin<br>Island | Pangnirtung | 25-August-1996 | Mmon_27 | MT251252 |
| CGG_1_017265 | <i>PG04-1032</i> | Eastern Baffin<br>Island | Pangnirtung | 07-July-2004   | Mmon_26 | MT251251 |
| CGG_1_017266 | <i>PG04-1179</i> | Eastern Baffin<br>Island | Pangnirtung | 07-July-2004   | Mmon_21 | MT251246 |
| CGG_1_017267 | <i>PG04-1183</i> | Eastern Baffin<br>Island | Pangnirtung | 07-July-2004   | Mmon_21 | MT251246 |
| CGG_1_017268 | <i>PI82-19</i>   | Eclipse Sound            | Pond Inlet  | 08-August-1982 | Mmon_28 | MT251253 |
| CGG_1_017272 | <i>PI10-1323</i> | Eclipse Sound            | Pond Inlet  | 22-August-2010 | Mmon_4  | MT251229 |
| CGG_1_017273 | <i>PI11-001</i>  | Eclipse Sound            | Pond Inlet  | 18-August-2011 | Mmon_29 | MT251254 |
| CGG_1_017274 | <i>PI11-003</i>  | Eclipse Sound            | Pond Inlet  | 19-August-2011 | Mmon_9  | MT251234 |

|              |                  |                        |              |                |         |          |
|--------------|------------------|------------------------|--------------|----------------|---------|----------|
| CGG_1_017275 | <i>PI11-006</i>  | Eclipse Sound          | Pond Inlet   | 16-August-2011 | Mmon_4  | MT251229 |
| CGG_1_017276 | <i>PI12-001</i>  | Eclipse Sound          | Pond Inlet   | 13-August-2012 | Mmon_29 | MT251254 |
| CGG_1_017277 | <i>PI12-003</i>  | Eclipse Sound          | Pond Inlet   | 14-August-2012 | Mmon_30 | MT251255 |
| CGG_1_017280 | <i>RB95-146</i>  | Northern<br>Hudson Bay | Repulse Bay  | 17-August-1995 | Mmon_31 | MT251256 |
| CGG_1_017282 | <i>RB00-1092</i> | Northern<br>Hudson Bay | Repulse Bay  | 21-July-2000   | Mmon_32 | MT251257 |
| CGG_1_017283 | <i>RB00-1094</i> | Northern<br>Hudson Bay | Repulse Bay  | 24-July-2000   | Mmon_33 | MT251258 |
| CGG_1_017284 | <i>RB00-1100</i> | Northern<br>Hudson Bay | Repulse Bay  | 07-July-2000   | Mmon_34 | MT251259 |
| CGG_1_017285 | <i>RB01-1142</i> | Northern<br>Hudson Bay | Repulse Bay  | 27-July-2001   | Mmon_35 | MT251260 |
| CGG_1_017286 | <i>RB06-1231</i> | Northern<br>Hudson Bay | Repulse Bay  | 15-July-2006   | Mmon_36 | MT251261 |
| CGG_1_017287 | <i>RB06-1251</i> | Northern<br>Hudson Bay | Repulse Bay  | 15-July-2006   | Mmon_4  | MT251229 |
| CGG_1_017288 | <i>RB07-001</i>  | Northern<br>Hudson Bay | Repulse Bay  | 2007           | Mmon_37 | MT251262 |
| CGG_1_017289 | <i>RB07-002A</i> | Northern<br>Hudson Bay | Repulse Bay  | 2007           | Mmon_38 | MT251263 |
| CGG_1_017295 | <i>RE02-1094</i> | Somerset Island        | Resolute Bay | 14-August-2002 | Mmon_4  | MT251229 |
| CGG_1_017296 | <i>RE02-1106</i> | Somerset Island        | Resolute Bay | 14-August-2002 | Mmon_39 | MT251264 |
| CGG_1_017297 | <i>RE06-1158</i> | Somerset Island        | Resolute Bay | 01-09-2006     | Mmon_40 | MT251265 |
| CGG_1_017298 | <i>RE02-1100</i> | Somerset Island        | Resolute Bay | 14-August-2002 | Mmon_41 | MT251266 |
| CGG_1_017302 | <i>SB96-398</i>  | Somerset Island        | Taloyoak     | 20-August-1996 | Mmon_4  | MT251229 |
| CGG_1_017303 | <i>SB09-1050</i> | Somerset Island        | Taloyoak     | 29-August-2009 | Mmon_42 | MT251267 |
| CGG_1_017304 | <i>SB09-1053</i> | Somerset Island        | Taloyoak     | 29-August-2009 | Mmon_59 | MT251284 |
| CGG_1_017305 | <i>SB09-1060</i> | Somerset Island        | Taloyoak     | 29-August-2009 | Mmon_5  | MT251230 |

|              |     |                       |                  |                   |         |          |
|--------------|-----|-----------------------|------------------|-------------------|---------|----------|
| CGG_1_017528 | 363 | Eastern Baffin Island | Broughton Island | 19-June-1905      | Mmon_4  | MT251229 |
| CGG_1_017529 | 574 | Eclipse Sound         | Tremblay Sound   | 21-August-1997    | Mmon_43 | MT251268 |
| CGG_1_017530 | 579 | Eclipse Sound         | Tremblay Sound   | 19-August-1997    | Mmon_43 | MT251268 |
| CGG_1_017531 | 590 | Eclipse Sound         | Tremblay Sound   | 21-August-1997    | Mmon_4  | MT251229 |
| CGG_1_017532 | 591 | Eclipse Sound         | Tremblay Sound   | 24-August-1997    | Mmon_44 | MT251269 |
| CGG_1_017533 | 640 | Eclipse Sound         | Tremblay Sound   | 24-August-1997    | Mmon_17 | MT251242 |
| CGG_1_017534 | 829 | Eclipse Sound         | Tremblay Sound   | 15-August-1999    | Mmon_4  | MT251229 |
| CGG_1_017536 | 831 | Eclipse Sound         | Tremblay Sound   | 16-August-1999    | Mmon_24 | MT251249 |
| CGG_1_017537 | 832 | Eclipse Sound         | Tremblay Sound   | 15-August-1999    | Mmon_4  | MT251229 |
| CGG_1_017542 | 841 | Melville Bay          | Melville Bugten  | 10-September-2006 | Mmon_45 | MT251270 |
| CGG_1_017543 | 842 | Melville Bay          | Melville Bugten  | 11-September-2006 | Mmon_46 | MT251271 |
| CGG_1_017544 | 843 | Melville Bay          | Melville Bugten  | 11-September-2006 | Mmon_47 | MT251272 |
| CGG_1_017545 | 844 | Melville Bay          | Melville Bugten  | 11-September-2006 | Mmon_47 | MT251272 |
| CGG_1_017546 | 845 | Melville Bay          | Melville Bugten  | 11-September-2006 | Mmon_48 | MT251273 |
| CGG_1_017547 | 846 | Melville Bay          | Melville Bugten  | 11-September-2006 | Mmon_46 | MT251271 |

|              |           |                        |                    |                       |         |          |
|--------------|-----------|------------------------|--------------------|-----------------------|---------|----------|
| CGG_1_017548 | 847       | Melville Bay           | Melville<br>Bugten | 11-September-<br>2006 | Mmon_46 | MT251271 |
| CGG_1_017549 | 869       | Melville Bay           | Melville<br>Bugten | 26-September-<br>2007 | Mmon_60 | MT251285 |
| CGG_1_017550 | 870       | Melville Bay           | Melville<br>Bugten | 03-September-<br>2007 | Mmon_61 | MT251286 |
| CGG_1_017551 | 871       | Melville Bay           | Melville<br>Bugten | 04-September-<br>2007 | Mmon_49 | MT251274 |
| CGG_1_017565 | 1679      | Inglefield<br>Bredning | Qaanaaq            | August-1993           | Mmon_62 | MT251287 |
| CGG_1_017566 | 1680      | Inglefield<br>Bredning | Qaanaaq            | August-1993           | Mmon_50 | MT251275 |
| CGG_1_017567 | 1681      | Inglefield<br>Bredning | Qaanaaq            | August-1993           | Mmon_17 | MT251242 |
| CGG_1_017568 | 1682      | Inglefield<br>Bredning | Qaanaaq            | August-1993           | Mmon_63 | MT251288 |
| CGG_1_017569 | 1683      | Inglefield<br>Bredning | Qaanaaq            | August-1993           | Mmon_4  | MT251229 |
| CGG_1_017570 | 1684      | Inglefield<br>Bredning | Qaanaaq            | August-1993           | Mmon_22 | MT251247 |
| CGG_1_017571 | 1685      | Inglefield<br>Bredning | Qaanaaq            | August-1993           | Mmon_51 | MT251276 |
| CGG_1_017572 | 1686      | Inglefield<br>Bredning | Qaanaaq            | August-1993           | Mmon_17 | MT251242 |
| CGG_1_017573 | 1687      | Inglefield<br>Bredning | Qaanaaq            | August-1993           | Mmon_17 | MT251242 |
| CGG_1_017574 | 1688      | Inglefield<br>Bredning | Qaanaaq            | August-1993           | Mmon_4  | MT251229 |
| CGG_1_017631 | MM2012/01 | Svalbard               | Svalbard           | 23-August-2012        | Mmon_64 | MT251289 |

Table S2. Accession numbers of the mitochondrial genome sequences of the 15 species of odontocetes analyzed in the fossil calibrated phylogenetic tree.

| <b>Species scientific name</b>     | <b>Species common name</b>     | <b>Accession number (NCBI)</b> |
|------------------------------------|--------------------------------|--------------------------------|
| <i>Berardius bairdii</i>           | Baird's beaked whale           | NC005274                       |
| <i>Cephalorhynchus heavisidii</i>  | Heaviside's dolphin            | NC020696                       |
| <i>Delphinus capensis</i>          | Long-beaked common dolphin     | NC012061                       |
| <i>Globicephala melas</i>          | Long-finned pilot whale        | HM060334                       |
| <i>Hyperoodon ampullatus</i>       | Northern bottlenose whale      | NC005273                       |
| <i>Kogia breviceps</i>             | Pygmy sperm whale              | NC005272                       |
| <i>Mesoplodon densirostris</i>     | Blainville's beaked whale      | KF032860                       |
| <i>Mesoplodon grayi</i>            | Gray's beaked whale            | KF981442                       |
| <i>Delphinapterus leucas</i>       | Beluga whale                   | MT251225                       |
| <i>Neophocaena asiaeorientalis</i> | Narrow-ridged finless porpoise | KP170488                       |
| <i>Neophocaena phocaenoides</i>    | Indo-Pacific finless porpoise  | NC 021461                      |
| <i>Orcinus orca</i>                | Killer whale                   | GU187155                       |
| <i>Phocoena phocoena</i>           | Harbour porpoise               | NC 005280                      |
| <i>Physeter macrocephalus</i>      | Sperm whale                    | NC 002503                      |
| <i>Monodon monoceros</i>           | Narwhal                        | MT251227                       |
| <i>Monodon monoceros</i>           | Narwhal                        | MT251230                       |
| <i>Monodon monoceros</i>           | Narwhal                        | MT251249                       |
| <i>Monodon monoceros</i>           | Narwhal                        | MT251262                       |

Table S3a. Partitioning scheme and substitution models used for the fossil-calibrated phylogeny of 15 species of toothed whales, identified by Partition Finder 2.1.1 using AIC [3]. Partitions 14, 17, 20, 22, 23, 26, 27, 29 and 30 only included third codon position of protein coding regions or the control region and were excluded due to substitution saturation or poor alignment. +I: Estimate the proportion of invariable sites. +X: Estimate the base frequencies using maximum

likelihoods. +G: Estimate the shape of the gamma distribution describing the evolutionary rate of sites.

| Partition | Model     | Length | Subsets                                             |
|-----------|-----------|--------|-----------------------------------------------------|
| 1         | TRN+G+X   | 207    | tRNA_Cys, tRNA_Glu, tRNA_Ala                        |
| 2         | GTR+G+X   | 284    | tRNA_Arg, tRNA_Lys, tRNA_His, tRNA_Phe              |
| 3         | TRN+I+G+X | 213    | tRNA_Asn, tRNA_Ser_1, tRNA_Leu_2                    |
| 4         | TRN+G+X   | 137    | tRNA_Asp, tRNA_Ile                                  |
| 5         | HKY+G+X   | 143    | tRNA_Gln, tRNA_Tyr                                  |
| 6         | GTR+I+G+X | 1673   | tRNA_Gly, rRNA_16S                                  |
| 7         | GTR+I+G+X | 775    | tRNA_Leu_1, CDS_CYTB_1, CDS_ND1_1                   |
| 8         | TRNEF+I+G | 588    | CDS_COX1_1, tRNA_Met                                |
| 9         | HKY+I+X   | 245    | CDS_ND6_2, tRNA_Pro                                 |
| 10        | GTR+G+X   | 385    | tRNA_Val, tRNA_Thr, CDS_ND3_1, tRNA_Ser_2, tRNA_Trp |
| 11        | TRN+I+G+X | 982    | rRNA_12S                                            |
| 12        | GTR+G+X   | 835    | CDS_ND5_1, CDS_ATP6_1                               |
| 13        | GTR+I+G+X | 1049   | CDS_ND5_2, CDS_ND3_2, CDS_ND4L_2, CDS_ATP6_2        |
| 14        | TRN+I+G+X | 671    | CDS_ATP8_3, CDS_ND3_3, CDS_ATP6_3, CDS_COX3_3       |
| 15        | GTR+G+X   | 482    | CDS_ND2_1, CDS_ATP8_2, CDS_ATP8_1                   |
| 16        | HKY+I+X   | 518    | CDS_COX1_2                                          |
| 17        | GTR+I+G+X | 518    | CDS_COX1_3                                          |
| 18        | TRN+G+X   | 490    | CDS_COX3_1, CDS_COX2_1                              |
| 19        | TRN+I+G+X | 228    | CDS_COX2_2                                          |
| 20        | TRN+I+G+X | 228    | CDS_COX2_3                                          |
| 21        | GTR+I+G+X | 1420   | CDS_COX3_2, CDS_ND4_2, CDS_CYTB_2, CDS_ND1_2        |
| 22        | TRN+I+G+X | 380    | CDS_CYTB_3                                          |
| 23        | GTR+I+G+X | 667    | CDS_ND1_3, CDS_ND2_3                                |
| 24        | TRN+G+X   | 348    | CDS_ND2_2                                           |
| 25        | TRN+G+X   | 558    | CDS_ND4_1, CDS_ND4L_1                               |
| 26        | TRN+I+G+X | 459    | CDS_ND4_3                                           |
| 27        | TRN+I+G+X | 707    | CDS_ND4L_3, CDS_ND5_3                               |
| 28        | TRN+G+X   | 176    | CDS_ND6_1                                           |
| 29        | HKY+G+X   | 176    | CDS_ND6_3                                           |
| 30        | HKY+G+X   | 972    | Ctrl-Reg_D-loop                                     |



Table S3b. Partitioning scheme and substitution models used in the construction of the narwhal time-calibrated phylogeny, identified by Partition Finder 2.1.1 [3]. +I: Estimate the proportion of invariable sites. +X: Estimate the base frequencies using maximum likelihoods. +G: Estimate the shape of the gamma distribution describing the evolutionary rate of sites.

| Partition | Model   | Length | Subset          |
|-----------|---------|--------|-----------------|
| 1         | TRN+X   | 3802   | CDS_ALL_1st     |
| 2         | HKY+X   | 3802   | CDS_ALL_2st     |
| 3         | TRN+G+X | 3802   | CDS_ALL_3st     |
| 4         | HKY+X   | 917    | Ctrl-Reg_D-loop |
| 5         | HKY+X   | 2553   | rRNA_ALL        |
| 6         | HKY+X   | 1516   | tRNA_ALL        |

Table S4. P-values of the test of significant differences in diversity indices between narwhal stocks (nucleotide diversity below diagonal and haplotype diversity above diagonal) calculated from the proportion of simulated values from the bootstraps (n=1000) that were equal to or greater than the observed value. Differences were considered significant if they were <0.05 and are indicated by blue shading and bold font.

| P-values (Pi)\(Hap)   |   | 1     | 2     | 3            | 4            | 5     | 6     | 7     | 8     | 9     | 10    |
|-----------------------|---|-------|-------|--------------|--------------|-------|-------|-------|-------|-------|-------|
| Admiralty Inlet       | 1 | --    | 0.98  | 0.381        | 0.933        | 0.876 | 0.876 | 0.869 | 0.186 | 0.985 | 0.486 |
| Eastern Baffin Island | 2 | 0.98  | --    | 0.196        | 0.996        | 0.726 | 0.741 | 0.759 | 0.123 | 0.782 | 0.137 |
| East Greenland        | 3 | 0.265 | 0.088 | --           | 0.21         | 0.331 | 0.35  | 0.353 | 0.744 | 0.224 | 0.776 |
| Eclipse Sound         | 4 | 0.527 | 0.323 | <b>0.025</b> | --           | 0.708 | 0.748 | 0.753 | 0.143 | 0.761 | 0.149 |
| Inglefield Bredning   | 5 | 0.575 | 0.463 | <b>0.047</b> | 0.976        | --    | 1     | 1     | 0.223 | 0.891 | 0.274 |
| Jones Sound           | 6 | 0.686 | 0.548 | 0.367        | 0.179        | 0.26  | --    | 1     | 0.222 | 0.916 | 0.31  |
| Melville Bay          | 7 | 0.681 | 0.539 | 0.369        | 0.172        | 0.25  | 0.986 | --    | 0.229 | 0.911 | 0.304 |
| Northern Hudson Bay   | 8 | 0.358 | 0.182 | 0.789        | <b>0.047</b> | 0.079 | 0.502 | 0.513 | --    | 0.151 | 1     |

|                 |    |       |       |              |       |       |       |       |              |       |      |
|-----------------|----|-------|-------|--------------|-------|-------|-------|-------|--------------|-------|------|
| Somerset Island | 9  | 0.485 | 0.228 | <b>0.009</b> | 0.925 | 0.912 | 0.117 | 0.117 | <b>0.026</b> | --    | 0.17 |
| Svalbard        | 10 | 0.249 | 0.154 | <b>0.018</b> | 0.416 | 0.439 | 0.097 | 0.089 | <b>0.035</b> | 0.455 | --   |

Table S5. Pairwise mitochondrial  $F_{ST}$  (above diagonal) and  $\Phi_{ST}$  (below diagonal) between narwhal stocks in the High Arctic. The colour gradient ranging from light yellow to red indicates the strength of the  $F_{ST}$  values in bins of 0.1; significant values ( $p < 0.05$ ) are indicated in bold font.

| $\Phi_{ST} \backslash F_{ST}$ |    | 1            | 2            | 3            | 4            | 5            | 6            | 7            | 8            | 9            | 10    |
|-------------------------------|----|--------------|--------------|--------------|--------------|--------------|--------------|--------------|--------------|--------------|-------|
| Admiralty Inlet               | 1  |              | -0.033       | -0.007       | -0.038       | 0.015        | 0.015        | 0.094        | 0.001        | -0.034       | 0.05  |
| Eastern Baffin Island         | 2  | -0.048       |              | 0.027        | 0.002        | 0.035        | <b>0.060</b> | <b>0.100</b> | 0.018        | 0.010        | 0.065 |
| East Greenland                | 3  | -0.009       | <b>0.131</b> |              | 0.037        | 0.037        | 0.026        | <b>0.059</b> | 0.002        | 0.025        | 0.015 |
| Eclipse Sound                 | 4  | -0.083       | 0.018        | <b>0.173</b> |              | -0.001       | <b>0.070</b> | <b>0.100</b> | 0.023        | -0.001       | 0.063 |
| Inglefield Bredning           | 5  | -0.072       | -0.019       | <b>0.168</b> | -0.041       |              | 0.061        | <b>0.089</b> | 0.023        | 0.026        | 0.050 |
| Jones Sound                   | 6  | -0.042       | 0.015        | 0.068        | 0.067        | 0.026        |              | <b>0.089</b> | 0.034        | 0.049        | 0.050 |
| Melville Bay                  | 7  | <b>0.315</b> | <b>0.413</b> | <b>0.186</b> | <b>0.435</b> | <b>0.439</b> | <b>0.305</b> |              | 0.045        | <b>0.092</b> | 0.050 |
| Northern Hudson Bay           | 8  | -0.085       | -0.027       | 0.019        | 0.054        | 0.008        | -0.043       | <b>0.303</b> |              | 0.022        | 0     |
| Somerset Island               | 9  | -0.068       | 0.018        | <b>0.212</b> | -0.034       | -0.041       | 0.073        | <b>0.481</b> | 0.067        |              | 0.057 |
| Svalbard                      | 10 | <b>0.317</b> | <b>0.331</b> | <b>0.252</b> | <b>0.454</b> | <b>0.451</b> | <b>0.372</b> | <b>0.599</b> | <b>0.204</b> | <b>0.448</b> |       |

Table S6. The mean and Effective Sample Size (ESS) values for the different parameters in the two combined runs of the toothed whale phylogeny. The models were run with tRNAs, rRNAs, first and second codon positions of the protein coding regions using a calibrated Yule prior model and relaxed log normal clock with an estimated rate.

| Statistic               | Mean      | ESS  |
|-------------------------|-----------|------|
| posterior               | -43964.08 | 3669 |
| likelihood              | -43707.25 | 3665 |
| prior                   | -256.83   | 2677 |
| treeLikelihood.Subset1  | -691.691  | 5036 |
| treeLikelihood.Subset10 | -1694.719 | 4310 |

|                             |           |       |
|-----------------------------|-----------|-------|
| treeLikelihood.Subset11     | -3774.62  | 7743  |
| treeLikelihood.Subset12     | -3943.278 | 6166  |
| treeLikelihood.Subset13     | -3008.306 | 4809  |
| treeLikelihood.Subset15     | -2271.965 | 4837  |
| treeLikelihood.Subset16     | -920.577  | 3744  |
| treeLikelihood.Subset18     | -1784.83  | 5563  |
| treeLikelihood.Subset19     | -470.004  | 4150  |
| treeLikelihood.Subset2      | -1395.139 | 4150  |
| treeLikelihood.Subset21     | -3127.104 | 4091  |
| treeLikelihood.Subset22     | -3297.297 | 5478  |
| treeLikelihood.Subset24     | -888.324  | 4407  |
| treeLikelihood.Subset25     | -2450.3   | 4723  |
| treeLikelihood.Subset28     | -720.021  | 3356  |
| treeLikelihood.Subset3      | -734.661  | 5882  |
| treeLikelihood.Subset4      | -441.184  | 2955  |
| treeLikelihood.Subset5      | -508.207  | 5172  |
| treeLikelihood.Subset6      | -5972.501 | 5913  |
| treeLikelihood.Subset7      | -3046.176 | 4448  |
| treeLikelihood.Subset8      | -1758.111 | 7502  |
| treeLikelihood.Subset9      | -808.237  | 5061  |
| TreeHeight                  | 28.756    | 8793  |
| uclMean                     | 4.03E-03  | 3397  |
| uclStdev                    | 0.262     | 3771  |
| rate.mean                   | 3.84E-03  | 5855  |
| rate.variance               | 1.16E-06  | 2907  |
| rate.coefficientOfVariation | 0.257     | 3707  |
| CalibratedYuleModel         | -83.422   | 5978  |
| birthRateY                  | 0.147     | 10589 |
| kappa1.1                    | 30.046    | 3090  |
| kappa1.11                   | 9.72      | 4183  |
| kappa1.18                   | 14.098    | 2766  |
| kappa1.19                   | 24.516    | 2140  |
| kappa1.22                   | 44.534    | 2049  |
| kappa1.24                   | 1.995     | 2543  |
| kappa1.25                   | 18.303    | 3792  |
| kappa1.28                   | 8.29      | 4006  |
| kappa1.3                    | 12.147    | 4326  |
| kappa1.4                    | 69.837    | 1596  |
| kappa1.8                    | 14.255    | 2592  |
| kappa2.1                    | 5.975     | 2674  |
| kappa2.11                   | 24.488    | 3866  |
| kappa2.18                   | 47.363    | 2634  |
| kappa2.19                   | 8.967     | 2476  |
| kappa2.22                   | 38.587    | 2064  |
| kappa2.24                   | 12.563    | 4291  |

|                  |          |      |
|------------------|----------|------|
| kappa2.25        | 47.69    | 3023 |
| kappa2.28        | 40.528   | 1707 |
| kappa2.3         | 6.781    | 3743 |
| kappa2.4         | 47.538   | 1548 |
| kappa2.8         | 40.15    | 2625 |
| mutationRate.1   | 0.634    | 6309 |
| mutationRate.10  | 0.959    | 3733 |
| mutationRate.11  | 0.978    | 3094 |
| mutationRate.12  | 1.016    | 3314 |
| mutationRate.13  | 0.599    | 3736 |
| mutationRate.15  | 1.009    | 4527 |
| mutationRate.16  | 8.17E-02 | 4381 |
| mutationRate.18  | 1.072    | 3003 |
| mutationRate.19  | 0.165    | 6055 |
| mutationRate.2   | 1.071    | 5337 |
| mutationRate.21  | 0.289    | 3192 |
| mutationRate.22  | 7.258    | 1163 |
| mutationRate.24  | 0.394    | 5811 |
| mutationRate.25  | 1.712    | 2649 |
| mutationRate.28  | 1.028    | 5313 |
| mutationRate.3   | 0.71     | 5462 |
| mutationRate.4   | 0.703    | 6210 |
| mutationRate.5   | 0.769    | 6185 |
| mutationRate.6   | 0.918    | 2203 |
| mutationRate.7   | 1.222    | 2523 |
| mutationRate.8   | 0.64     | 4678 |
| mutationRate.9   | 0.508    | 6670 |
| gammaShape.1     | 0.398    | 4208 |
| gammaShape.11    | 0.209    | 7370 |
| gammaShape.13    | 4.07E-02 | 3721 |
| gammaShape.18    | 0.103    | 2914 |
| gammaShape.19    | 0.103    | 1665 |
| gammaShape.21    | 3.51E-02 | 3722 |
| gammaShape.22    | 4.299    | 3225 |
| gammaShape.24    | 7.59E-02 | 3382 |
| gammaShape.25    | 0.147    | 6551 |
| gammaShape.28    | 0.408    | 4091 |
| gammaShape.3     | 0.12     | 3431 |
| gammaShape.4     | 6.81E-02 | 3061 |
| gammaShape.5     | 0.145    | 2681 |
| gammaShape.6     | 0.141    | 5943 |
| gammaShape.7     | 0.159    | 6254 |
| gammaShape.8     | 5.10E-02 | 3375 |
| freqParameter.11 | 0.265    | 3210 |
| freqParameter.12 | 0.144    | 3889 |

|                   |          |      |
|-------------------|----------|------|
| freqParameter.13  | 0.243    | 3041 |
| freqParameter.14  | 0.348    | 3220 |
| freqParameter.101 | 0.311    | 2478 |
| freqParameter.102 | 0.236    | 2657 |
| freqParameter.103 | 0.177    | 2726 |
| freqParameter.104 | 0.276    | 2274 |
| freqParameter.111 | 0.357    | 3040 |
| freqParameter.112 | 0.241    | 3121 |
| freqParameter.113 | 0.184    | 2723 |
| freqParameter.114 | 0.218    | 3147 |
| freqParameter.121 | 0.344    | 2321 |
| freqParameter.122 | 0.239    | 2696 |
| freqParameter.123 | 0.181    | 2679 |
| freqParameter.124 | 0.236    | 2398 |
| freqParameter.131 | 0.203    | 3316 |
| freqParameter.132 | 0.283    | 3370 |
| freqParameter.133 | 9.33E-02 | 2950 |
| freqParameter.134 | 0.421    | 2809 |
| freqParameter.151 | 0.367    | 2813 |
| freqParameter.152 | 0.26     | 2939 |
| freqParameter.153 | 0.126    | 2683 |
| freqParameter.154 | 0.247    | 2483 |
| freqParameter.161 | 0.181    | 3670 |
| freqParameter.162 | 0.263    | 3187 |
| freqParameter.163 | 0.148    | 3211 |
| freqParameter.164 | 0.407    | 3092 |
| freqParameter.181 | 0.268    | 3244 |
| freqParameter.182 | 0.301    | 2962 |
| freqParameter.183 | 0.222    | 2867 |
| freqParameter.184 | 0.208    | 2751 |
| freqParameter.191 | 0.263    | 3551 |
| freqParameter.192 | 0.247    | 3395 |
| freqParameter.193 | 0.117    | 3403 |
| freqParameter.194 | 0.373    | 2984 |
| freqParameter.181 | 0.268    | 3244 |
| freqParameter.182 | 0.301    | 2962 |
| freqParameter.183 | 0.222    | 2867 |
| freqParameter.184 | 0.208    | 2751 |
| freqParameter.191 | 0.263    | 3551 |
| freqParameter.192 | 0.247    | 3395 |
| freqParameter.193 | 0.117    | 3403 |
| freqParameter.194 | 0.373    | 2984 |
| freqParameter.21  | 0.359    | 2670 |
| freqParameter.22  | 0.191    | 2838 |
| freqParameter.23  | 0.164    | 2523 |

|                   |          |      |
|-------------------|----------|------|
| freqParameter.24  | 0.286    | 2719 |
| freqParameter.211 | 0.189    | 3617 |
| freqParameter.212 | 0.268    | 3706 |
| freqParameter.213 | 0.128    | 3045 |
| freqParameter.214 | 0.415    | 3291 |
| freqParameter.221 | 0.408    | 1100 |
| freqParameter.222 | 0.39     | 1236 |
| freqParameter.223 | 3.82E-02 | 1257 |
| freqParameter.224 | 0.163    | 1382 |
| freqParameter.241 | 0.17     | 3830 |
| freqParameter.242 | 0.323    | 2957 |
| freqParameter.243 | 8.14E-02 | 3997 |
| freqParameter.244 | 0.426    | 2858 |
| freqParameter.251 | 0.344    | 2330 |
| freqParameter.252 | 0.319    | 2699 |
| freqParameter.253 | 0.148    | 3107 |
| freqParameter.254 | 0.189    | 2362 |
| freqParameter.281 | 0.228    | 3312 |
| freqParameter.282 | 4.76E-02 | 1344 |
| freqParameter.283 | 0.433    | 2604 |
| freqParameter.284 | 0.291    | 2877 |
| freqParameter.31  | 0.322    | 3204 |
| freqParameter.32  | 0.158    | 2763 |
| freqParameter.33  | 0.225    | 3652 |
| freqParameter.34  | 0.295    | 3052 |
| freqParameter.41  | 0.393    | 2701 |
| freqParameter.42  | 0.157    | 3673 |
| freqParameter.43  | 0.137    | 3058 |
| freqParameter.44  | 0.313    | 2783 |
| freqParameter.51  | 0.309    | 3515 |
| freqParameter.52  | 0.138    | 3913 |
| freqParameter.53  | 0.261    | 3512 |
| freqParameter.54  | 0.292    | 3591 |
| freqParameter.61  | 0.365    | 2544 |
| freqParameter.62  | 0.219    | 2572 |
| freqParameter.63  | 0.168    | 2336 |
| freqParameter.64  | 0.247    | 2606 |
| freqParameter.71  | 0.299    | 2600 |
| freqParameter.72  | 0.304    | 2306 |
| freqParameter.73  | 0.195    | 2732 |
| freqParameter.74  | 0.202    | 2602 |
| freqParameter.91  | 0.169    | 4056 |
| freqParameter.92  | 0.153    | 3998 |
| freqParameter.93  | 0.264    | 3543 |
| freqParameter.94  | 0.414    | 2966 |

|                        |          |      |
|------------------------|----------|------|
| rateAC.10              | 7.58E-02 | 5284 |
| rateAC.12              | 9.56E-02 | 5082 |
| rateAC.13              | 0.165    | 6195 |
| rateAC.15              | 0.117    | 5027 |
| rateAC.2               | 0.18     | 4683 |
| rateAC.21              | 8.41E-02 | 4917 |
| rateAC.6               | 0.103    | 4537 |
| rateAC.7               | 3.01E-02 | 3835 |
| rateAG.10              | 0.362    | 2801 |
| rateAG.12              | 0.483    | 2777 |
| rateAG.13              | 1.759    | 4527 |
| rateAG.15              | 0.777    | 2955 |
| rateAG.2               | 0.756    | 2477 |
| rateAG.21              | 0.799    | 5279 |
| rateAG.6               | 0.36     | 2991 |
| rateAG.7               | 0.492    | 2876 |
| rateAT.10              | 2.75E-02 | 4123 |
| rateAT.12              | 7.13E-02 | 5732 |
| rateAT.13              | 9.05E-02 | 6251 |
| rateAT.15              | 0.118    | 6100 |
| rateAT.2               | 0.112    | 4506 |
| rateAT.21              | 8.77E-02 | 5914 |
| rateAT.6               | 7.34E-02 | 5061 |
| rateAT.7               | 5.05E-02 | 4984 |
| rateCG.10              | 3.02E-02 | 4009 |
| rateCG.12              | 1.80E-02 | 4408 |
| rateCG.13              | 0.235    | 5324 |
| rateCG.15              | 4.67E-02 | 3692 |
| rateCG.2               | 7.24E-02 | 3595 |
| rateCG.21              | 0.171    | 5305 |
| rateCG.6               | 1.86E-02 | 3705 |
| rateCG.7               | 9.20E-03 | 3601 |
| rateGT.10              | 2.25E-02 | 3470 |
| rateGT.12              | 3.37E-02 | 5058 |
| rateGT.13              | 5.17E-02 | 3488 |
| rateGT.15              | 7.08E-02 | 4308 |
| rateGT.2               | 3.64E-02 | 3538 |
| rateGT.21              | 3.27E-02 | 2779 |
| rateGT.6               | 2.81E-02 | 5086 |
| rateGT.7               | 2.97E-02 | 4194 |
| proportionInvariant.11 | 0.00E+00 | -    |
| proportionInvariant.13 | 0.00E+00 | -    |
| proportionInvariant.16 | 0.00E+00 | -    |
| proportionInvariant.19 | 0.00E+00 | -    |
| proportionInvariant.21 | 0.00E+00 | -    |

|                                               |          |       |
|-----------------------------------------------|----------|-------|
| proportionInvariant.22                        | 0.00E+00 | -     |
| proportionInvariant.3                         | 0.00E+00 | -     |
| proportionInvariant.6                         | 0.00E+00 | -     |
| proportionInvariant.7                         | 0.00E+00 | -     |
| proportionInvariant.8                         | 0.00E+00 | -     |
| proportionInvariant.9                         | 0.00E+00 | -     |
| kappa.16                                      | 4.167    | 4595  |
| kappa.5                                       | 55.386   | 3360  |
| kappa.9                                       | 11.866   | 5599  |
| logP(mrca(F.kelloggi_root))                   | -3.127   | 11349 |
| mrca.age(F.kelloggi_root)                     | 28.756   | 8793  |
| logP(mrca(K.Pernix_Delphinidae+Ziphiidae))    | -3.197   | 3871  |
| mrca.age(K.Pernix_Delphinidae+Ziphiidae)      | 25.354   | 4174  |
| logP(mrca(S.Stocktoni_Monodontoidae))         | -3.039   | 2533  |
| mrca.age(S.Stocktoni_Monodontoidae)           | 12.109   | 2695  |
| logP(mrca(A.Microglenoideus_Crown_Ziphiidae)) | -1.593   | 8280  |
| mrca.age(A.Microglenoideus_Crown_Ziphiidae)   | 15.068   | 8162  |

Table S7. The mean and Effective Sample Size (ESS) values for the different parameters in the two combined runs of the narwhal phylogeny. The models were run with the full partitioned mitochondrial genome, using a coalescent constant population model and a strict clock.

| Statistic              | Mean       | ESS   |
|------------------------|------------|-------|
| posterior              | -23060.075 | 15857 |
| likelihood             | -23049.402 | 7378  |
| prior                  | -10.673    | 18223 |
| treeLikelihood.Subset1 | -5410.325  | 9683  |
| treeLikelihood.Subset2 | -5005.363  | 6926  |
| treeLikelihood.Subset3 | -5454.521  | 2059  |



|                        |           |       |
|------------------------|-----------|-------|
| treeLikelihood.Subset4 | -1480.404 | 1139  |
| treeLikelihood.Subset5 | -3561.676 | 10099 |
| treeLikelihood.Subset6 | -2137.112 | 5446  |
| TreeHeight             | 0.11      | 37851 |
| kappa1.1               | 21.859    | 3120  |
| kappa1.3               | 57.234    | 2608  |
| kappa2.1               | 7.042     | 3224  |
| kappa2.3               | 29.808    | 2566  |
| mutationRate.1         | 0.479     | 10796 |
| mutationRate.2         | 0.231     | 9880  |
| mutationRate.3         | 2.547     | 6992  |
| mutationRate.4         | 2.273     | 14506 |
| mutationRate.5         | 0.423     | 13666 |
| mutationRate.6         | 0.555     | 16010 |
| kappa.2                | 20.383    | 2466  |
| kappa.4                | 28.592    | 4177  |
| kappa.5                | 9.215     | 3726  |
| kappa.6                | 25.232    | 2049  |
| gammaShape.3           | 0.299     | 2356  |

|                            |          |       |
|----------------------------|----------|-------|
| clockRate                  | 9.95E-03 | 31802 |
| popSize                    | 0.247    | 24908 |
| CoalescentConstant         | 28.713   | 25919 |
| logP(mrca(tree_age_prior)) | 1.896    | 52508 |
| mrca.age(tree_age_prior)   | 0.11     | 37851 |
| freqParameter.11           | 0.323    | 4477  |
| freqParameter.12           | 0.255    | 4276  |
| freqParameter.13           | 0.199    | 5121  |
| freqParameter.14           | 0.223    | 4739  |
| freqParameter.21           | 0.196    | 5344  |
| freqParameter.22           | 0.267    | 4409  |
| freqParameter.23           | 0.12     | 5628  |
| freqParameter.24           | 0.417    | 4509  |
| freqParameter.31           | 0.417    | 4493  |
| freqParameter.32           | 0.335    | 4768  |
| freqParameter.33           | 4.68E-02 | 4804  |
| freqParameter.34           | 0.201    | 5551  |
| freqParameter.41           | 0.299    | 4860  |
| freqParameter.42           | 0.248    | 5434  |

|                  |       |      |
|------------------|-------|------|
| freqParameter.43 | 0.14  | 5929 |
| freqParameter.44 | 0.313 | 5098 |
| freqParameter.51 | 0.368 | 4669 |
| freqParameter.52 | 0.218 | 4966 |
| freqParameter.53 | 0.175 | 5126 |
| freqParameter.54 | 0.238 | 5234 |
| freqParameter.61 | 0.325 | 5043 |
| freqParameter.62 | 0.18  | 4922 |
| freqParameter.63 | 0.192 | 5400 |
| freqParameter.64 | 0.303 | 5221 |

---

Table S8. The mean and Effective Sample Size (ESS) values for the different parameters two combined runs of the coalescent Bayesian skyline analysis. The models were run with the full partitioned mitochondrial genome, using a strict clock.

| <b>Statistic</b>       | <b>Mean</b> | <b>ESS</b> |
|------------------------|-------------|------------|
| posterior              | -23058.5    | 9464       |
| likelihood             | -23130      | 3412       |
| prior                  | 71.426      | 9471       |
| treeLikelihood.Subset1 | -5424.87    | 6573       |

|                        |          |       |
|------------------------|----------|-------|
| treeLikelihood.Subset2 | -5007.34 | 5860  |
| treeLikelihood.Subset3 | -5493.42 | 734   |
| treeLikelihood.Subset4 | -1486.61 | 368   |
| treeLikelihood.Subset5 | -3563.89 | 7975  |
| treeLikelihood.Subset6 | -2153.83 | 526   |
| TreeHeight             | 9.16E-02 | 15574 |
| kappa1.1               | 20.964   | 2347  |
| kappa1.3               | 59.88    | 2092  |
| kappa2.1               | 8.588    | 2340  |
| kappa2.3               | 29.564   | 2024  |
| mutationRate.1         | 0.492    | 11496 |
| mutationRate.2         | 0.227    | 11950 |
| mutationRate.3         | 2.543    | 7798  |
| mutationRate.4         | 2.211    | 14099 |
| mutationRate.5         | 0.415    | 13804 |
| mutationRate.6         | 0.595    | 17656 |
| kappa.2                | 20.121   | 2146  |
| kappa.4                | 28.076   | 3718  |
| kappa.5                | 9.06     | 3652  |

|                        |          |       |
|------------------------|----------|-------|
| kappa.6                | 13.71    | 2978  |
| gammaShape.3           | 0.345    | 2184  |
| clockRate              | 1.10E-02 | 12632 |
| BayesianSkyline        | 107.04   | 9524  |
| bPopSizes.1            | 0.409    | 8974  |
| bPopSizes.2            | 0.271    | 9436  |
| bPopSizes.3            | 0.199    | 6367  |
| bPopSizes.4            | 0.129    | 5438  |
| bPopSizes.5            | 8.12E-02 | 16505 |
| bGroupSizes.1          | 24.918   | 3873  |
| bGroupSizes.2          | 24.577   | 8170  |
| bGroupSizes.3          | 23.413   | 10956 |
| bGroupSizes.4          | 24.147   | 8166  |
| bGroupSizes.5          | 22.945   | 4543  |
| logP(mrca(tree_prior)) | 2.041    | 24262 |
| mrca.age(tree_prior)   | 9.16E-02 | 15574 |
| freqParameter.11       | 0.323    | 3977  |
| freqParameter.12       | 0.255    | 4404  |
| freqParameter.13       | 0.199    | 3924  |

|                  |          |      |
|------------------|----------|------|
| freqParameter.14 | 0.223    | 4316 |
| freqParameter.21 | 0.196    | 4241 |
| freqParameter.22 | 0.267    | 4099 |
| freqParameter.23 | 0.12     | 4086 |
| freqParameter.24 | 0.417    | 3635 |
| freqParameter.31 | 0.417    | 3621 |
| freqParameter.32 | 0.335    | 3795 |
| freqParameter.33 | 4.68E-02 | 3468 |
| freqParameter.34 | 0.201    | 4201 |
| freqParameter.41 | 0.299    | 4130 |
| freqParameter.42 | 0.248    | 4126 |
| freqParameter.64 | 0.14     | 4659 |
| freqParameter.44 | 0.313    | 4011 |
| freqParameter.51 | 0.368    | 3922 |
| freqParameter.52 | 0.218    | 4585 |
| freqParameter.53 | 0.175    | 4273 |
| freqParameter.54 | 0.238    | 4489 |
| freqParameter.61 | 0.324    | 4223 |
| freqParameter.62 | 0.18     | 4764 |

|                  |       |      |
|------------------|-------|------|
| freqParameter.63 | 0.192 | 4608 |
| freqParameter.64 | 0.304 | 4579 |

## Literature

1. NAMMCO. 2018 Report of the Global Review of Monodontids. 13-16 March 2017, Hillerød Denmark.
2. Ahonen H, Stafford KM, Lydersen C, de Steur L, Kovacs KM. 2019 A multi-year study of narwhal occurrence in the western Fram Strait—detected via passive acoustic monitoring. *Polar Research* **38**. (doi:10.33265/polar.v38.3468)
3. Lanfear R, Frandsen PB, Wright AM, Senfeld T, Calcott B. 2016 PartitionFinder 2: new methods for selecting partitioned models of evolution for molecular and morphological phylogenetic analyses. *Mol. Biol. Evol.* **34**: 772-77.
